# Supplementary material for: Structural Characterization of a Pleurotus sajor-caju Polysaccharide and Its Neuroprotection Related to the Inhibition of Oxidative Stress
Source: MDPI journal article supplement (doi:10.3390/nu14194047), 2022-09-29
Supplement: s1 [file s1]

# Structural Characterization of *Pleurotus sajor-caju* polysaccharides and its neuroprotection related to inhibition on oxidative stress

Mengdi Liu <sup>1,2,†</sup>, Yingdi Dai <sup>1,2,†</sup>, Chengming Song <sup>2</sup>, Jia Wang <sup>3</sup>, Yang Liu <sup>1,2\*</sup> and Qi Wang <sup>1,2\*</sup>

<sup>1</sup> Engineering Research Center of Chinese Ministry of Education for Edible and Medicinal Fungi, Jilin Agricultural University, Changchun 130118, China

<sup>2</sup> College of Plant Protection, Jilin Agricultural University, Changchun 130118, China

<sup>3</sup> Guang'anmen Hospital China Academy of Chinese Medical Sciences Respiratory Department, Beijing 100053, China

\* Correspondence: y\_liu10@jlau.edu.cn (Y.L.); qiwang@jlau.edu.cn (Q.W.); Tel./Fax: +86-431-84532989(Y.L.); Tel./Fax: +86-431-84533269 (Q.W.)

† These authors contributed equally to this work.

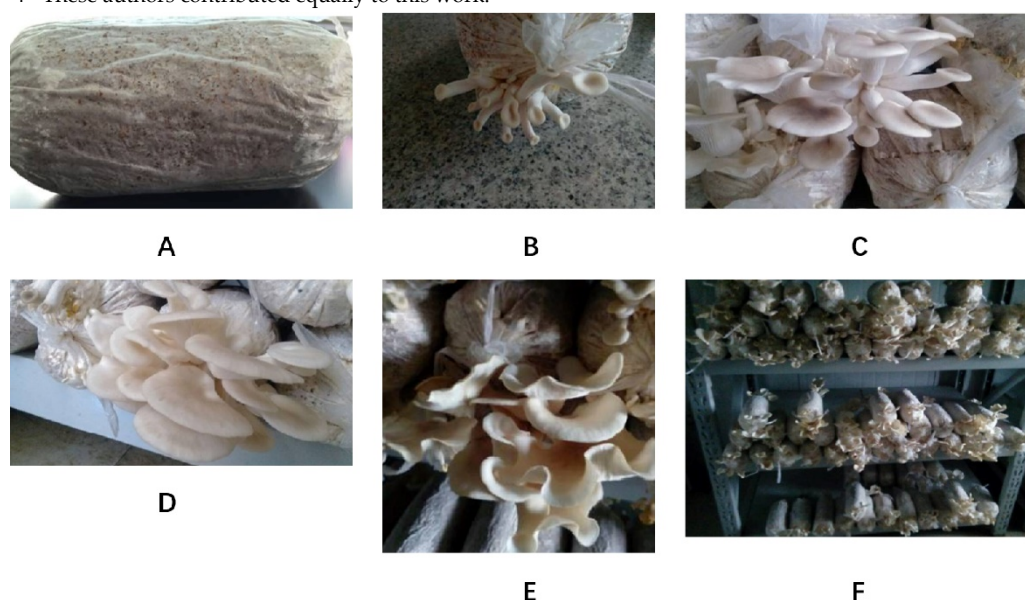

**Figure S1.** Results of PCR for ITS sequences. (A) Primordium formation stage. (B) Mulberry period. (C) Coral period. (D) Growing period. (E) The mature period. (F) Indoor growing environment.

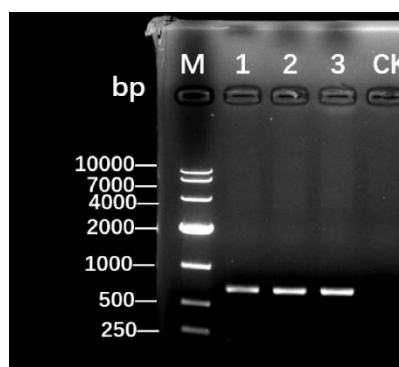

**Figure S2.** Results of PCR for ITS sequences

M: DNA maker, CK: negative control. 1-3 was three parallel experiments of the sample.

Sequence ID: Query\_33249 Length: 694 Number of Matches: 1

Range 1: 1 to 659 [Graphics](#)[▼ Next Match ▲](#)

| Score          | Expect                                                         | Identities   | Gaps      | Strand     |
|----------------|----------------------------------------------------------------|--------------|-----------|------------|
| 1197 bits(648) | 0.0                                                            | 656/659(99%) | 3/659(0%) | Plus/Minus |
| Query 11       | AGT-CTA-CTGATTGAGGTCAA-TTGTCAAATTGTCCTTGGCGACGATTAGAGAGCTGG    | 67           |           |            |
| Sbjct 659      | AGTCCTACCTGATTGAGGTCAAATTGTCAAATTGTCCTTGGCGACGATTAGAGAGCTGG    | 600          |           |            |
| Query 68       | ACTCTATTTCATGCGTGCTATTGATGAGTGATAATTATCACATCATGCCGAGAGGCAATGA  | 127          |           |            |
| Sbjct 599      | ACTCTATTTCATGCGTGCTATTGATGAGTGATAATTATCACATCATGCCGAGAGGCAATGA  | 540          |           |            |
| Query 128      | GAAGTCCTGCTAATGCATTTAAGAGGAGCCGACTTGTACAGCCAGCAACCCCCAACAAAT   | 187          |           |            |
| Sbjct 539      | GAAGTCCTGCTAATGCATTTAAGAGGAGCCGACTTGTACAGCCAGCAACCCCCAACAAAT   | 480          |           |            |
| Query 188      | CCAAACATCACAATAAATGTGAGTTTGAGAAATTAATGACACTCAAACAGGCATGCCCC    | 247          |           |            |
| Sbjct 479      | CCAAACATCACAATAAATGTGAGTTTGAGAAATTAATGACACTCAAACAGGCATGCCCC    | 420          |           |            |
| Query 248      | TCGGAATACCAAGGGGCGCAAGGTGCGTTCAAAGATTTCGATGATTCACTGAATTCTGCAA  | 307          |           |            |
| Sbjct 419      | TCGGAATACCAAGGGGCGCAAGGTGCGTTCAAAGATTTCGATGATTCACTGAATTCTGCAA  | 360          |           |            |
| Query 308      | TTCACATTACTTATCGCATTTGCGTGGCTTCTTCATCGATGCGAGAGCCAAGAGATCCGT   | 367          |           |            |
| Sbjct 359      | TTCACATTACTTATCGCATTTGCGTGGCTTCTTCATCGATGCGAGAGCCAAGAGATCCGT   | 300          |           |            |
| Query 368      | TGTTGAAAGTTGTATTATGGTTTATAGGCACAAGGCCATTAAATGACATTTCGTAGACAT   | 427          |           |            |
| Sbjct 299      | TGTTGAAAGTTGTATTATGGTTTATAGGCACAAGGCCATTAAATGACATTTCGTAGACAT   | 240          |           |            |
| Query 428      | ACATTTGGGGTGTGTTAAGTAAATAGACTGCGTTGTCACACCGAGACGTTTAAATCCCAG   | 487          |           |            |
| Sbjct 239      | ACATTTGGGGTGTGTTAAGTAAATAGACTGCGTTGTCACACCGAGACGTTTAAATCCCAG   | 180          |           |            |
| Query 488      | CAAAACCAAGTCTGACGACTTGAAGGACGACTTCACAGATCTATCAAAAGTTTCACAGGTGG | 547          |           |            |
| Sbjct 179      | CAAAACCAAGTCTGACGACTTGAAGGACGACTTCACAGATCTATCAAAAGTTTCACAGGTGG | 120          |           |            |
| Query 548      | TTGAAAGACTAGTGAAGCGTGCACATGCCCTAGAGGCCAGCAACAACCTCCATAGTGAAT   | 607          |           |            |
| Sbjct 119      | TTGAAAGACTAGTGAAGCGTGCACATGCCCTAGAGGCCAGCAACAACCTCCATAGTGAAT   | 60           |           |            |
| Query 608      | TCATTAATGATCCTTCCGCAGGTTACCTACGGAACCTTGTACGACTTTTACTTCCA       | 666          |           |            |
| Sbjct 59       | TCATTAATGATCCTTCCGCAGGTTACCTACGGAACCTTGTACGACTTTTACTTCCA       | 1            |           |            |

**Figure S3.** Results of ITS sequence alignment (Compared with *Pleurotus sajor-caju* GenBank: AY540328.1 on NCBI, the similarity was over 99%, and it was identified as *Pleurotus sajor-caju*.)
